# Supplementary material for: Electrochemical Deposition of Bismuth on Graphite Felt Electrodes: Influence on Negative Half-Cell Reactions in Vanadium Redox Flow Batteries
Source: MDPI journal article supplement (doi:10.3390/app14083316), 2024-04-15

## project 1

Spectrum processing:

Peaks that may be overlooked: 3.706 keV

Processing options: All analyzed elements (normalized)

Number of repeats = 1

standard sample :

C CaCO<sub>3</sub> 1-Jun-1999 12:00 AM

O SiO<sub>2</sub> 1-Jun-1999 12:00 AM

Cr Cr 1-Jun-1999 12:00 AM

Fe Fe 1-Jun-1999 12:00 AM

Bi Bi 1-Jun-1999 12:00 AM

| element | weight     | atom       |
|---------|------------|------------|
|         | percentage | percentage |
| C K     | 87.75      | 88.03      |
| O K     | 16.11      | 12.13      |
| Cr L    | -0.93      | -0.22      |
| Fe L    | 1.39       | 0.30       |
| Bi M    | -4.32      | -0.25      |
| total   | 100.00     |            |

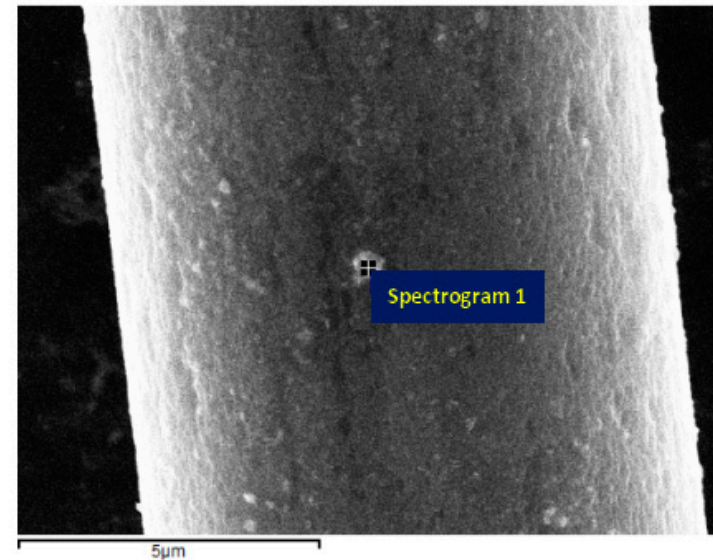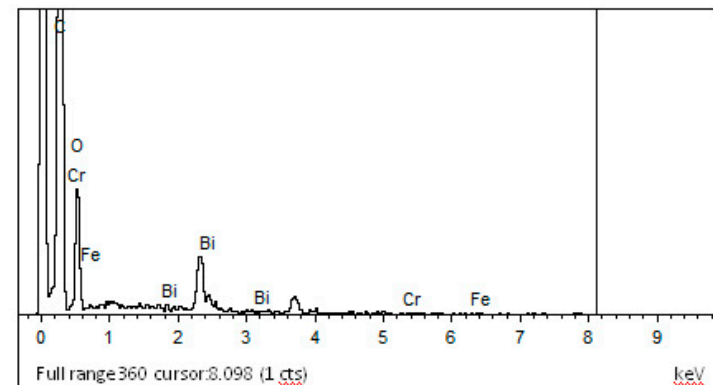

Supplement: s1 [file s1]
